# Supplementary material for: Novel Endophytic Pseudescherichia sp. GSE25 Strain Significantly Controls Fusarium graminearum and Reduces Deoxynivalenol in Wheat
Source: MDPI journal article supplement (doi:10.3390/toxins15120702), 2023-12-15
Supplement: s1 [file s1]

**Table S1.** General Database Annotations.

| Database             | Number | 100<=length<300 | length>=300 |
|----------------------|--------|-----------------|-------------|
| eggNOG_Annotation    | 4,028  | 1,851           | 1,919       |
| GO_Annotation        | 3,322  | 1,440           | 1,697       |
| kegg_Annotation      | 2,784  | 1,181           | 1,475       |
| nr_Annotation        | 4,454  | 2,530           | 1,977       |
| Pfam_Annotation      | 3,943  | 1,782           | 1,898       |
| Swissprot_Annotation | 3,312  | 1,425           | 1,685       |
| TrEMBL_Annotation    | 4,448  | 2,053           | 1,977       |
| All Annotated        | 4,459  | 2,055           | 1,977       |
