# Supplementary material for: Novel Endophytic Pseudescherichia sp. GSE25 Strain Significantly Controls Fusarium graminearum and Reduces Deoxynivalenol in Wheat
Source: MDPI journal article supplement (doi:10.3390/toxins15120702), 2023-12-15

### Nr Homologous Species Distribution

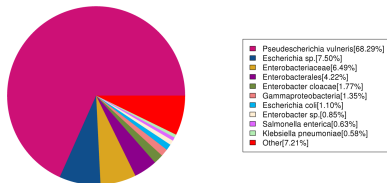

C

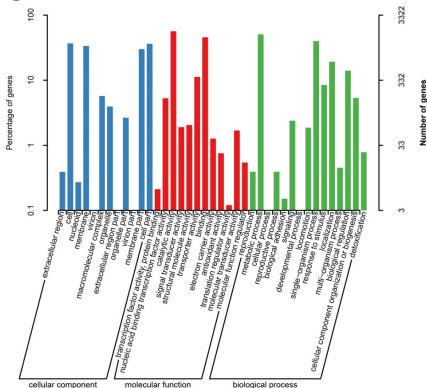

# B

eggNOG Function Classification of Consensus Sequence

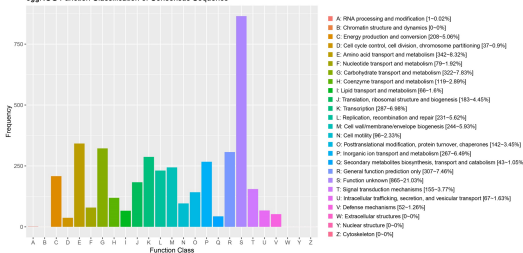

D

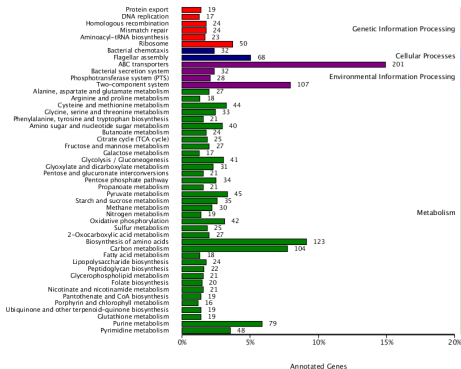

Supplement: s1 [file s1]
