# Supplementary figures and images for: Novel Endophytic Pseudescherichia sp. GSE25 Strain Significantly Controls Fusarium graminearum and Reduces Deoxynivalenol in Wheat
Source: MDPI journal article supplement (doi:10.3390/toxins15120702), 2023-12-15

**A**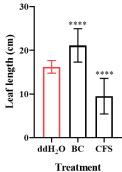**B**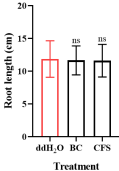

Supplement: s1 [file s1]

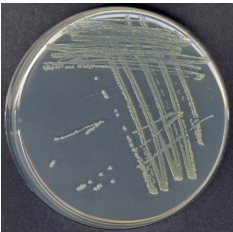

Supplement: s1 [file s1]
